# Supplementary material for: Magnetic anisotropy on demand exploiting high-pressure as remote control: an ab initio proof of concept
Source: Royal Society of Chemistry journal article supplement (doi:10.1039/d1dt01719e), 2021-01-01
Supplement: d1dt01719e1.pdf [file d1dt01719e1.pdf]

## Supporting Information for

# **“Magnetic anisotropy on demand exploiting high-pressure as remote control: an *ab initio* proof of concept”**

Matteo Briganti,<sup>a</sup> Federico Totti\*<sup>a</sup>

<sup>a</sup>Department of Chemistry “U. Schiff” and INSTM Udr Firenze, University of Florence, Via della Lastruccia 3–13, 50019 Sesto Fiorentino, Italy

| Press.<br>(GPa) | Volume (Å <sup>3</sup> ) | a (Å)      | b (Å)      | c (Å)       | $\alpha$ (°) | $\beta$ (°) | $\gamma$ (°) |
|-----------------|--------------------------|------------|------------|-------------|--------------|-------------|--------------|
| <b>Exp</b>      | 1213.5(2)                | 8.7190(10) | 9.0790(10) | 15.6370(10) | 82.962(5)    | 85.824(5)   | 81.637(5)    |
| <b>0</b>        | 1.198.201                | 8.509      | 9.182      | 15.623      | 82.905       | 85.507      | 82.425       |
| <b>3</b>        | 1.063.343                | 8.143      | 8.765      | 15.192      | 82.620       | 84.991      | 82.529       |
| <b>4</b>        | 1.031.624                | 8.083      | 8.619      | 15.117      | 82.346       | 84.455      | 82.573       |
| <b>5</b>        | 1.009.649                | 8.056      | 8.472      | 15.125      | 81.722       | 84.143      | 82.736       |
| <b>5.5</b>      | 1.000.697                | 8.038      | 8.438      | 15.093      | 81.602       | 84.051      | 82.707       |
| <b>5.6</b>      | 1.002.171                | 8.044      | 8.442      | 15.094      | 81.626       | 84.065      | 82.735       |
| <b>5.7</b>      | 993.282                  | 8.080      | 8.361      | 15.078      | 81.172       | 83.486      | 82.438       |
| <b>5.8</b>      | 985.007                  | 8.047      | 8.347      | 15.033      | 81.205       | 83.214      | 82.858       |
| <b>6</b>        | 986.784                  | 8.042      | 8.373      | 15.007      | 81.458       | 83.450      | 82.792       |
| <b>7</b>        | 963.666                  | 7.984      | 8.260      | 14.958      | 81.706       | 82.876      | 83.323       |
| <b>9</b>        | 933.267                  | 7.958      | 8.184      | 14.707      | 81.522       | 82.279      | 82.744       |
| <b>10</b>       | 920.524                  | 7.913      | 8.148      | 14.648      | 81.563       | 82.213      | 82.939       |
| <b>12</b>       | 893.335                  | 7.853      | 8.036      | 14.540      | 81.457       | 81.763      | 83.056       |

**Table S1.** Experimental and optimized cell parameters at several pressures.

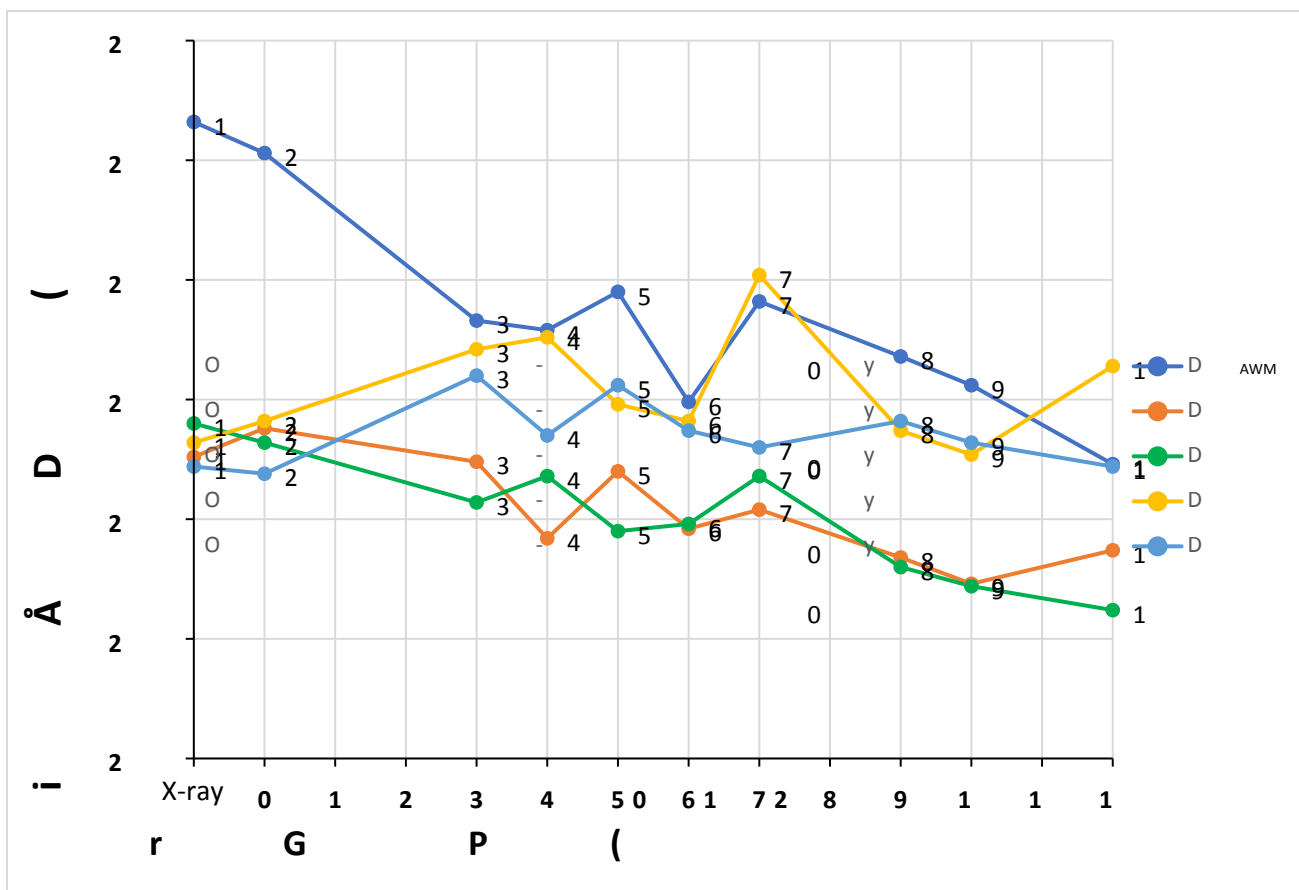

**Figure S1.** Bond distances between dysprosium and the five oxygen atoms in the optimized structure at different pressures of 1.

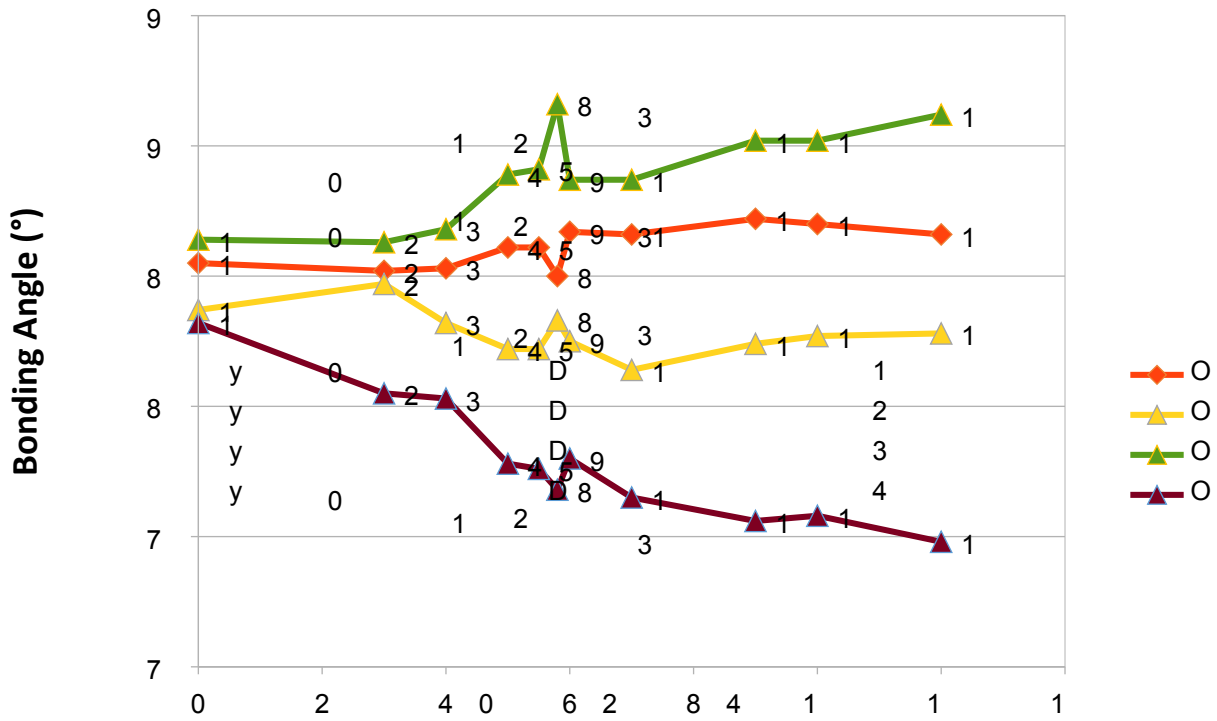

**Figure S2.** Bond angles between dysprosium and the four oxygen atoms in the optimized structure at different pressures of **1**.

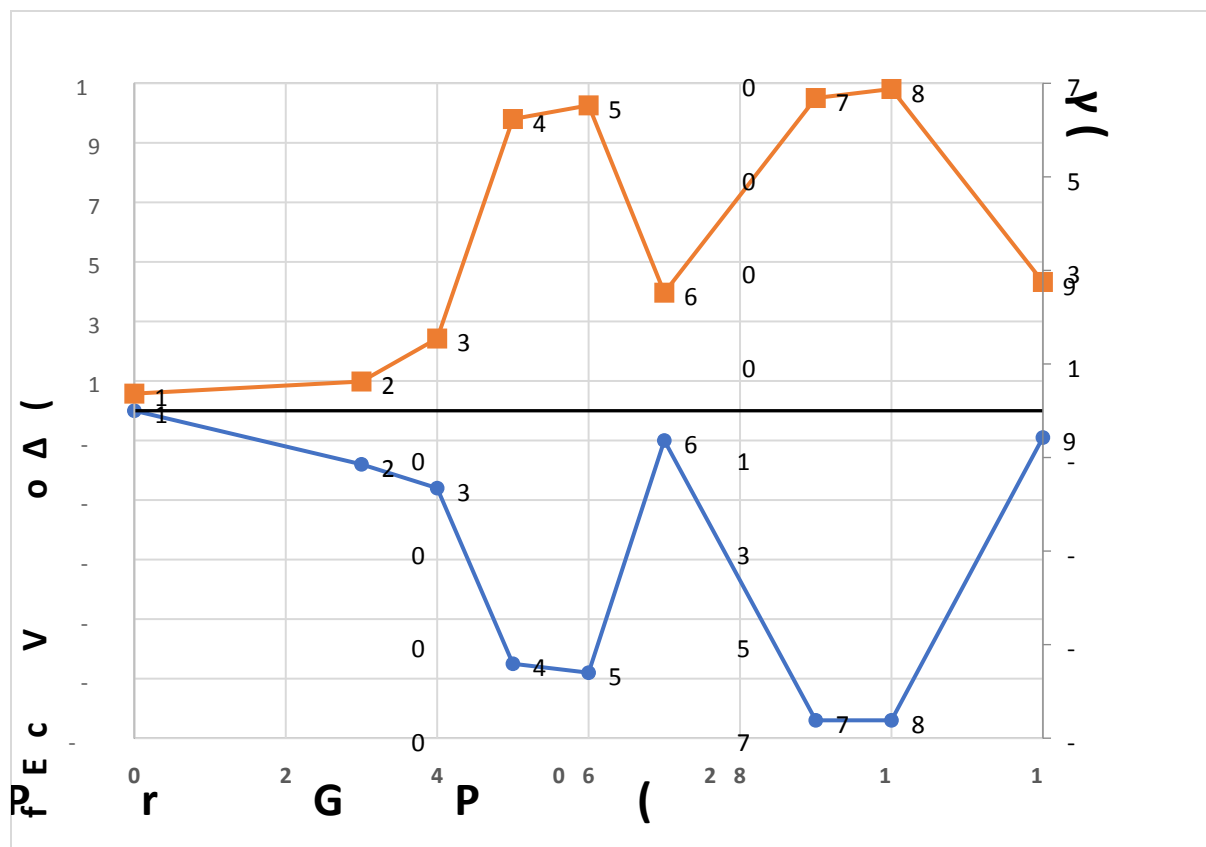

**Figure S3.** Model **M2m**. Variation of the energy gap between ground and first excited KD with respect to the value computed at 0 GPa (Blue) and angle between computed and experimental MEA (orange).

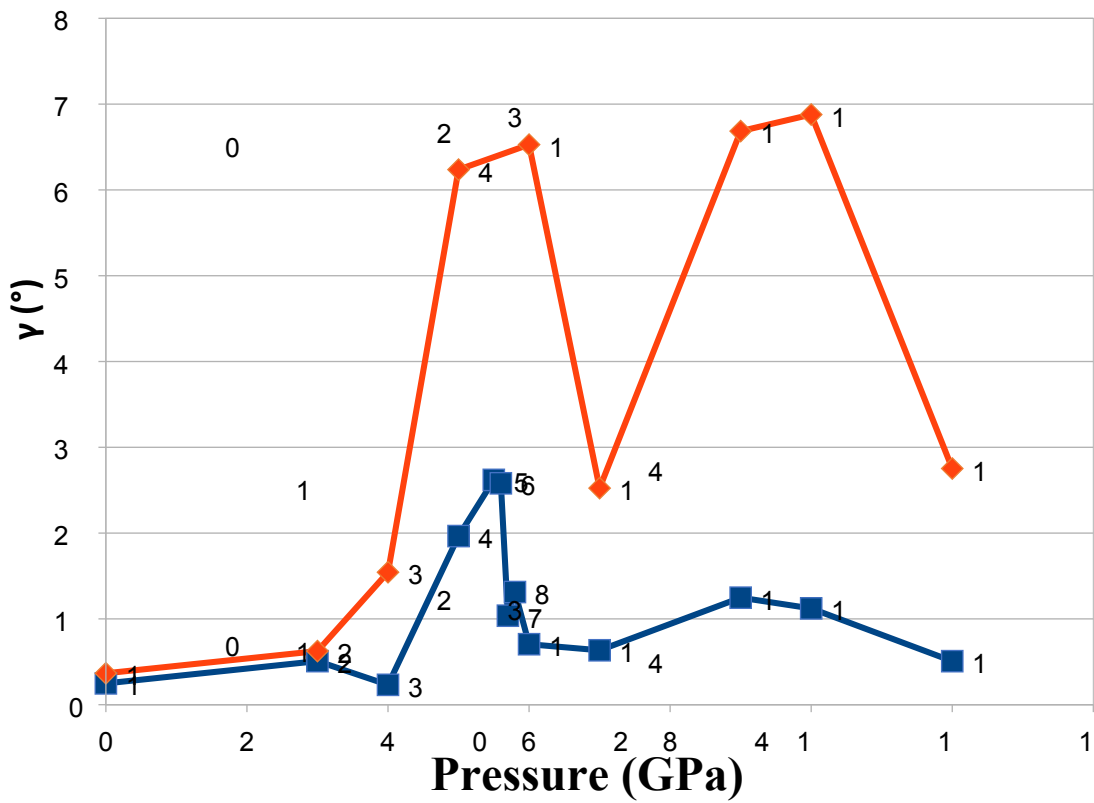

**Figure S4.** Angle between the computed magnetic easy axes and the experimental one at standard pressure (1 bar) of the ground KD for models **M1** (blue) and **M2m** (orange), for several values of the simulated pressure.

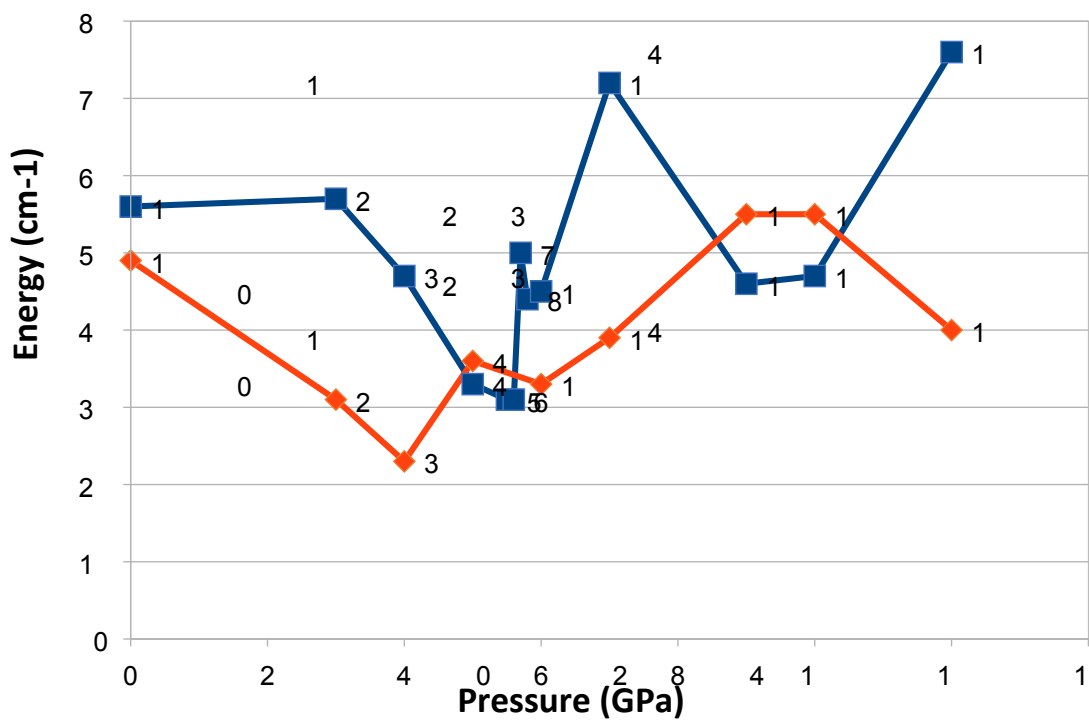

**Figure S5.** Energy of the first excited KD for models **M1** (blue) and **M2m** (orange), computed on the optimized geometry for several values of the external pressure
